# Supplementary material
Source: HighWire-hosted journal article supplement (https://bmjopenquality.bmj.com/highwire/filestream/136024/field_highwire_adjunct_files/0/ds6139.pdf)
Supplement: ds6139.pdf [file ds6139.pdf]

# A multi-faceted approach to improving pain management in the emergency department – *Online supplement*

Ratneswaran C, Dodd K, Krishnanandan S, Enright K, Dasan S

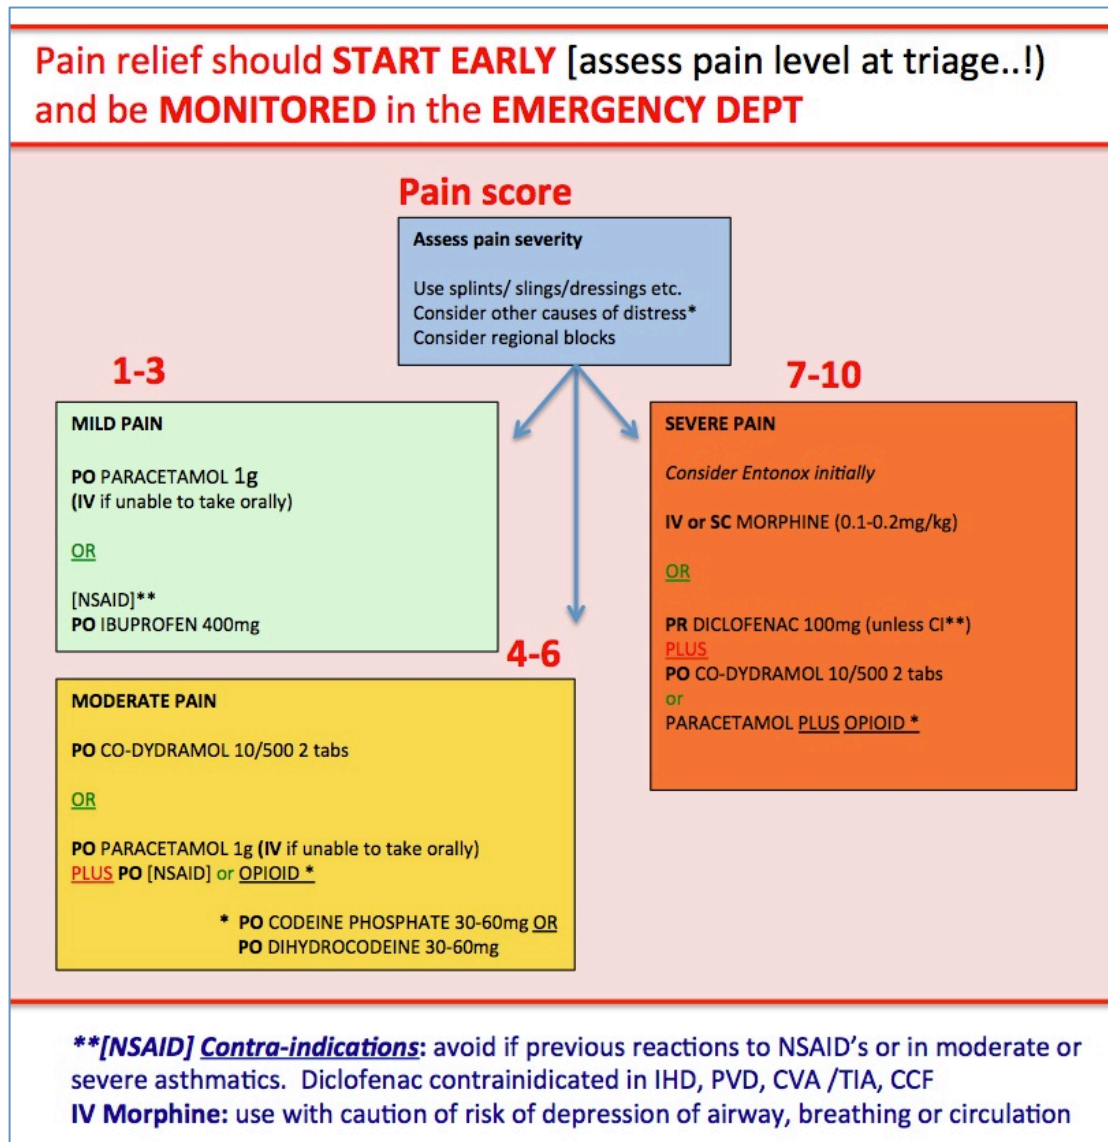

**Figure 1:** New emergency department pain relief algorithm

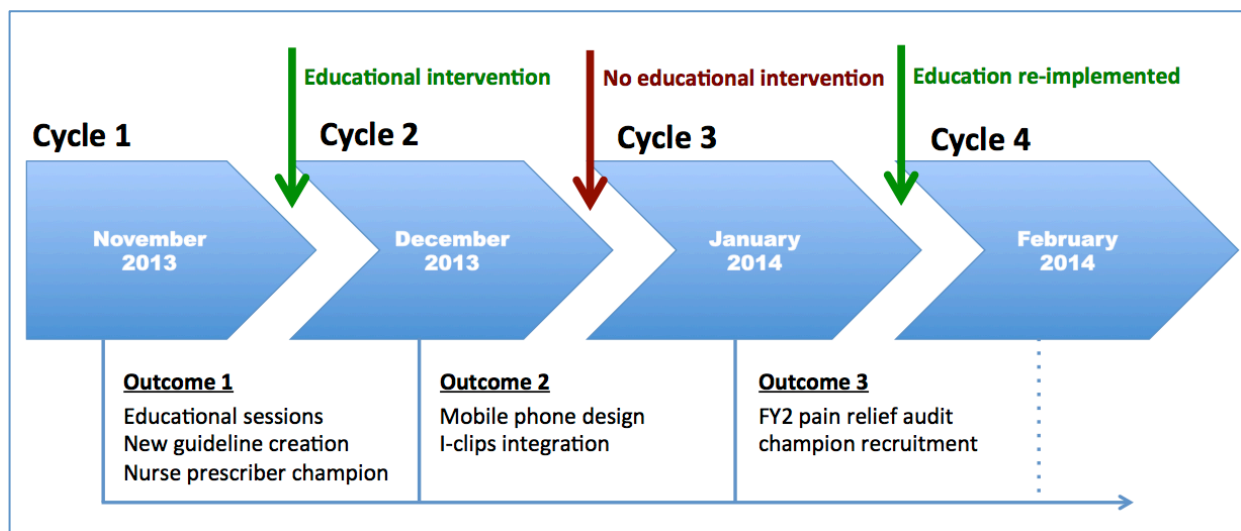

**Figure 2:** Audit pathway and chronological intervention time-line

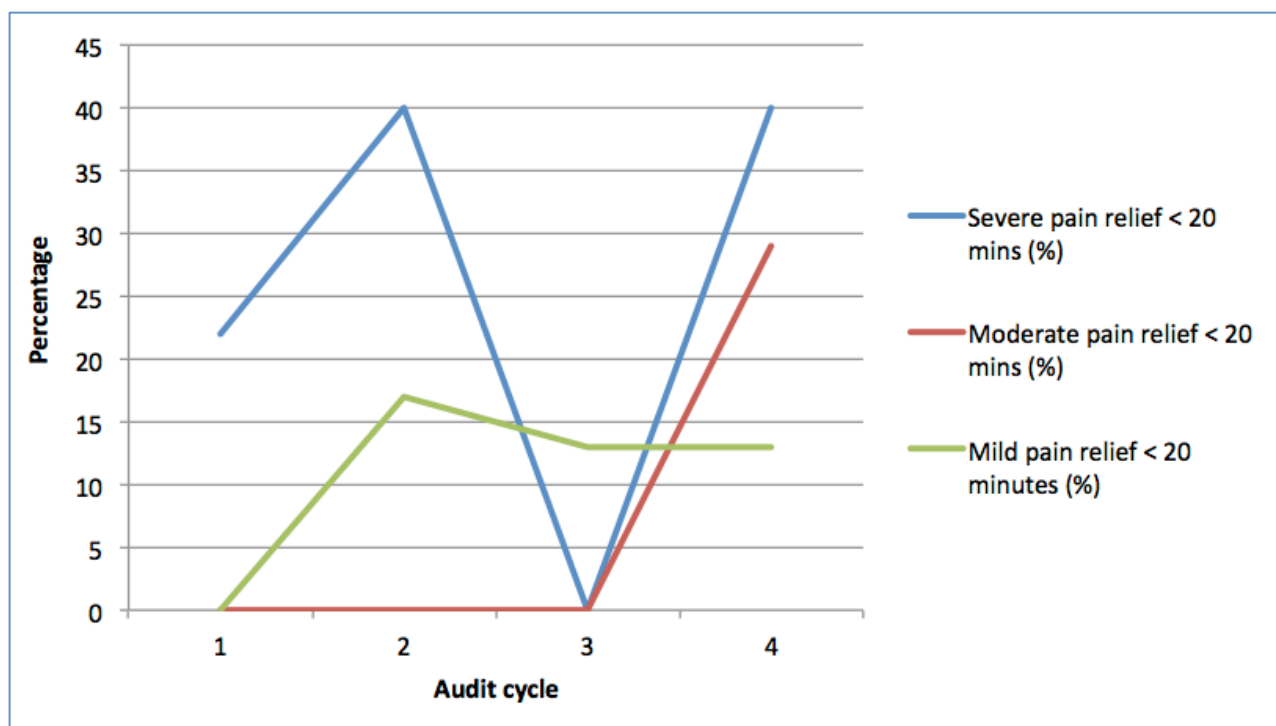

**Figure 3:** Patients in mild, moderate and severe pain that were prescribed analgesia within 20 minutes

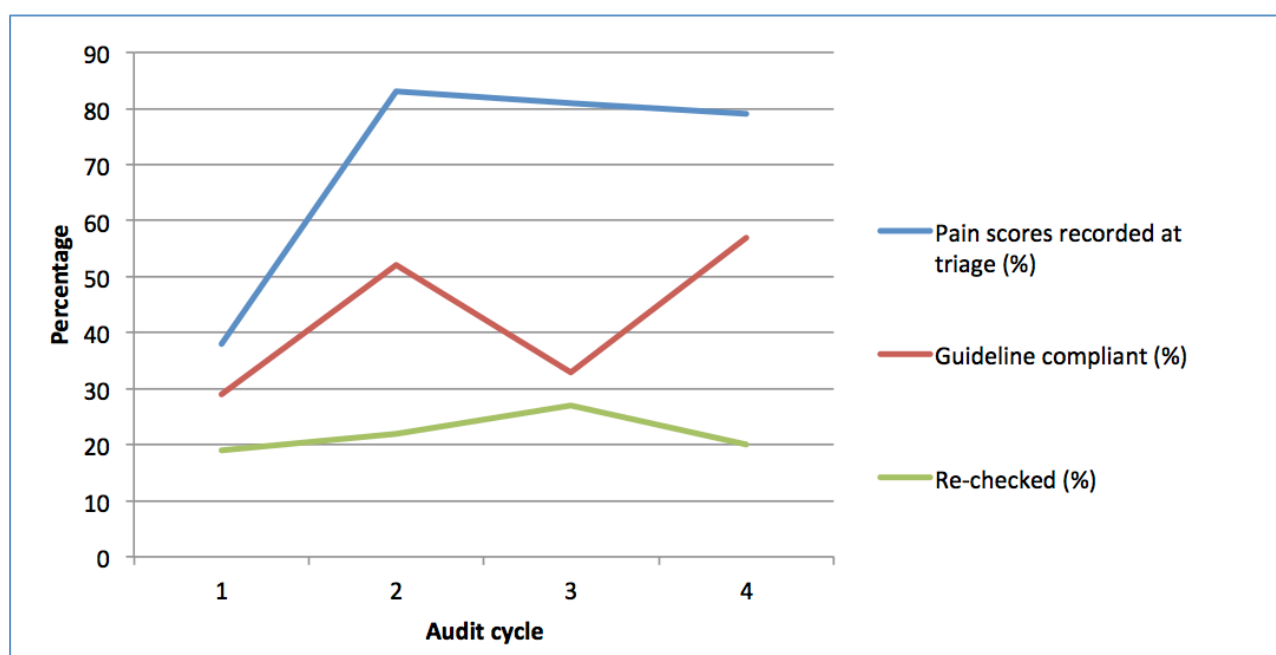

**Figure 4:** Pain score documentation at triage, guideline compliance and 1 hour re-checking
